# Supplementary material
Source: HighWire-hosted journal article supplement (http://www.qdcxjkg.com/highwire/filestream/113606/field_highwire_adjunct_files/3/patient_info_-_tests_conducted_in_tb_clinics_-_gujarati.pdf)
Supplement: patient_info_-_tests_conducted_in_tb_clinics_-_gujarati.pdf [file patient_info_-_tests_conducted_in_tb_clinics_-_gujarati.pdf]

## ટી.બી ક્લિનિકોમાં કરવામાં આવતી તપાસો

### છાતીનો એક્સરે

આ તપાસ તમને ફેફસાનો ટીબી છે કે નહીં તે તપાસવા માટે કરવામાં આવે છે. તમારી સારવાર કામ કરી રહી છે કે નહીં તે તપાસવા માટે કદાચ આ તપાસ ફરીથી કરવામાં આવે.

### સ્પ્યૂટમ/ફ્લેમ ટેસ્ટ

તમને કદાચ તમારા ફેફસામાં ટીબી છે કે નહીં તે તપાસવા માટે સ્પ્યૂટમ નમૂનાઓ આપવા માટે કહેવામાં આવે. તમારી સારવાર કામ કરી રહી છે કે નહીં તે તપાસવા માટે કદાચ આ તપાસ ફરીથી કરવામાં આવે.

### લોહીની તપાસો

તમે એનીમીક (પાંડુરોગ) હોવ અથવા તમને શરીરમાં કોઈ ચેપ લાગેલ હોય તે લોહીની તપાસ કરવા મારફત જાણી શકાય છે. સારવારની શરૂઆત બાદ ફરીથી તપાસો કરવાથી એ જાણી શકાય છે કે ચેપ જઈ રહ્યો છે કે નહીં.

સારવાર પહેલાં અને તે દરમિયાન તમારું પિત્તાશય અને મુત્રપિંડ કેવી રીતે કાર્ય કરે છે તે જાણવા માટે બીજી તપાસો કરવામાં આવે છે. આવી તપાસો મહત્વની હોય છે કારણકે અમુક દવાઓ તમારા પિત્તાશય અને મૂત્રપિંડના કાર્યને અસર કરી શકે.

## અન્ય ચેપો માટેની તપાસો

અમે ટીબી ક્લિનિકમાં હાજરી આપતા દરેક લોકોને એચઆઈવીની તપાસ પ્રસ્તુત કે ઓફર કરીએ છીએ. એચઆઈવી શરીરની સંરક્ષણ પદ્ધતિને નુકસાન કરે છે તેથી ટીબી વધારે સરળતાથી રહી શકે. એસઆઈવી માટેની સારવાર સારી છેકેજે તમારા આરોગ્યમાં સુધારો કરી શકે છે.

## અન્ય ચેપો માટેની તપાસો

અમે કદાચ હેપટાઈટિસ બી અને હેપટાઈટિસ સીના ચેપો માટેની પણ તપાસો કરીએ. આ ચેપો તમારું પિત્તાશય કેવી રીતે કામ કરે છે તેમાં ફેરફારો કરે છે અને તમારી ટી બીની સારવાર ઉપર તેની અસર કરી છે. જો તમારો ટેસ્ટ પોઝિટીવ હોય તો તમને કદાચ એક વિશેષજ્ઞ ટીમને તમારો ઉલ્લેખ કરી શકાય.

## ગુપ્તતા

તમારી બધીજ તપાસોના પરિણામોને ગુપ્ત રાખવામાં આવશે અને તમારી કેઅરમાં ત્રુટ્પક્ષરીતે સમાવિષ્ટ થયેલ ઘંઘાઘારીઓ (ટ્રેફેશનલ્સ) સાથે તે ફક્ત શેર કરવામાં આવશે.

## આગળ વધા માહિતી

એચ.આઈ.વી

NAHIP: [www.nahip.org.uk](http://www.nahip.org.uk)

Do It Right:

[www.doitright.uk.com](http://www.doitright.uk.com)

THT: [www.tht.org.uk](http://www.tht.org.uk)

ટીબી

NKS TB:

[www.hpa.org.uk/tbknowledge](http://www.hpa.org.uk/tbknowledge)

TB Alert: [www.tbalert.org](http://www.tbalert.org)

અન્ય ઉપયોગી સાઈટો

NHS choices: [www.nhs.uk](http://www.nhs.uk)

Health Protection Agency:

[www.hpa.org.uk](http://www.hpa.org.uk)
